# Supplementary material for: Interface dependence of electrical contact and graphene doping in graphene/XPtY (X, Y = S, Se, and Te) heterostructures
Source: Royal Society of Chemistry journal article supplement (doi:10.1039/d1cp01292d), 2021-01-01
Supplement: d1cp01292d1.pdf [file d1cp01292d1.pdf]

# Interface dependence of electrical contact and graphene doping in graphene/XPtY (X, Y= S, Se, Te) heterostructures

Weiwei Ju<sup>1,2\*</sup>, Donghui Wang<sup>1</sup>, Qingxiao Zhou<sup>1</sup>, Dawei Kang<sup>1</sup>,  
Tongwei Li<sup>1</sup>, Guangxiong Hu<sup>1</sup>, Haisheng Li<sup>1</sup>

<sup>1</sup>College of Physics and Engineering, Henan University of Science and Technology, Luoyang 471023, China

<sup>2</sup>Provincial and Ministerial Co-construction of Collaborative Innovation Center for Non-ferrous Metal New Materials and Advanced Processing Technology, Luoyang 471023, China

\*Corresponding author, Email: [hnjww@126.com](mailto:hnjww@126.com)

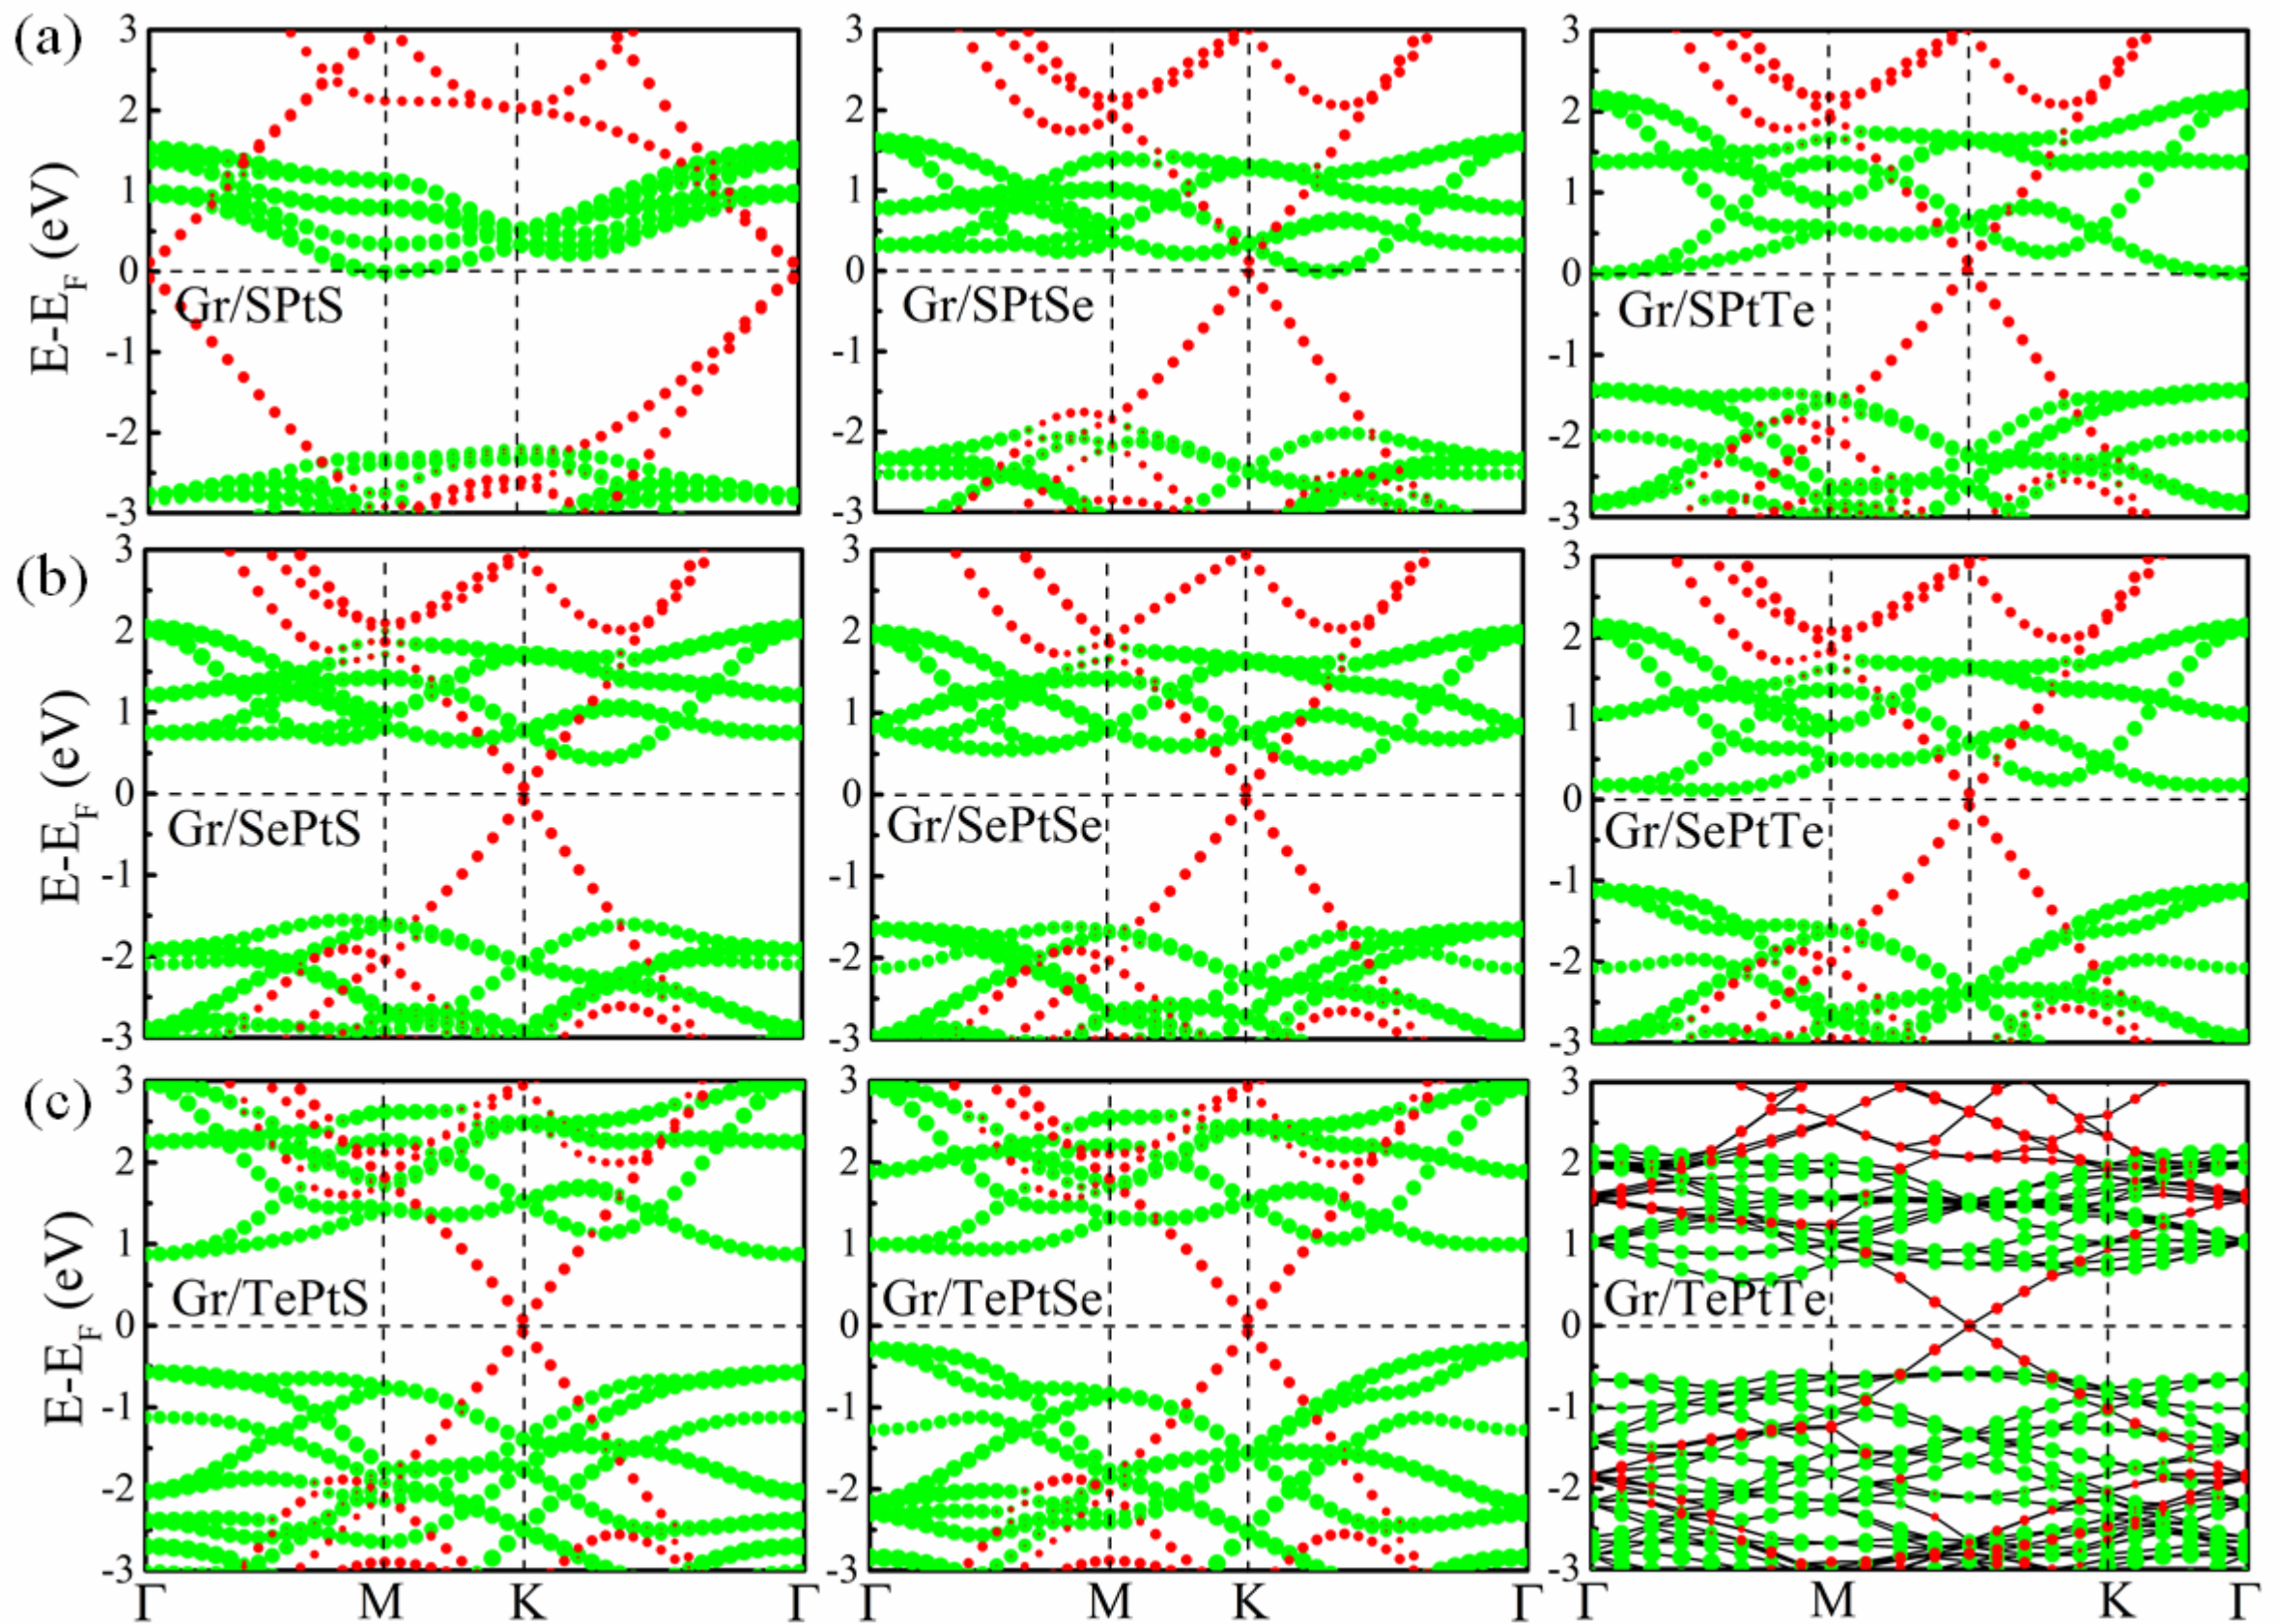

**Fig. S1** The projected band structures of the Gr/XPtY systems based on HSE06 hybrid functional method. The green and red lines stand for the contribution of XPtY layer and Gr, respectively. (a) The Gr/SPtY systems. (b) The Gr/SePtY systems. (c) The Gr/TePtY systems..
